# Supplementary material for: Hydrogen-bonding interactions of uric acid complexes with water/melamine by mid-infrared spectroscopy
Source: Royal Society of Chemistry journal article supplement (doi:10.1039/c5cp03494a), 2015-01-01
Supplement: c5cp03494a1.pdf [file c5cp03494a1.pdf]

**Supporting Information for**  
**“Hydrogen-Bonding Interactions of Uric Acid Complexes with Water/Melamine**  
**Revealed by Mid-Infrared Spectroscopy”**

Hiroyuki Saigusa,\* Daisuke Nakamura and Shuhei-Urashima

Graduate School of Bio- and Nanosystem Sciences, Yokohama City University,  
Yokohama 236-0027, Japan.

(Dated:            )

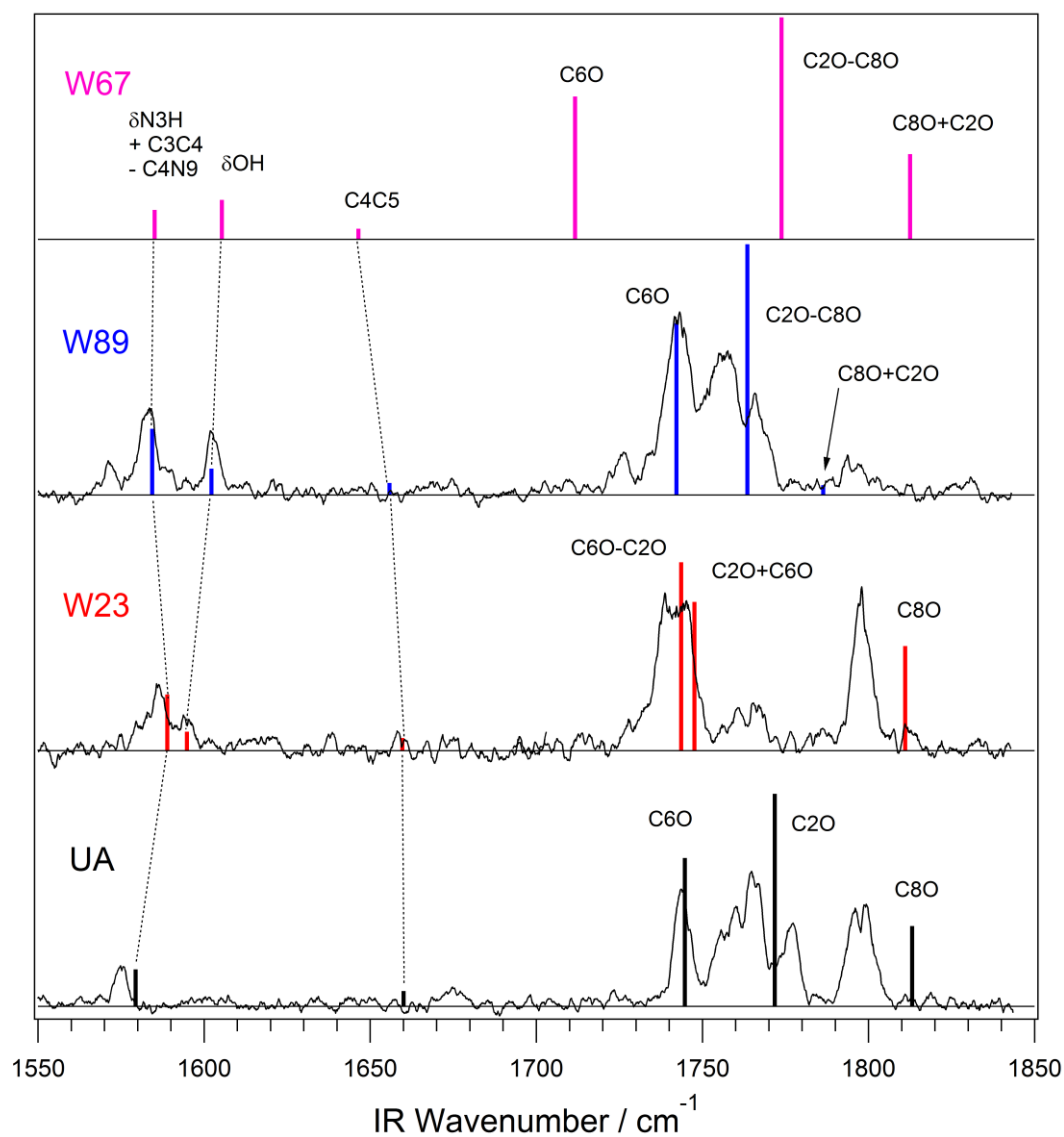

**Fig. S1** Calculated IR spectra (scaled by a factor of 0.982) and vibrational assignments for the three lowest energy isomers (W23, W89, and W67 in Fig. 1) of the monohydrated clusters of UA. Experimental IR spectra reproduced from Fig. 3 are shown for comparison.

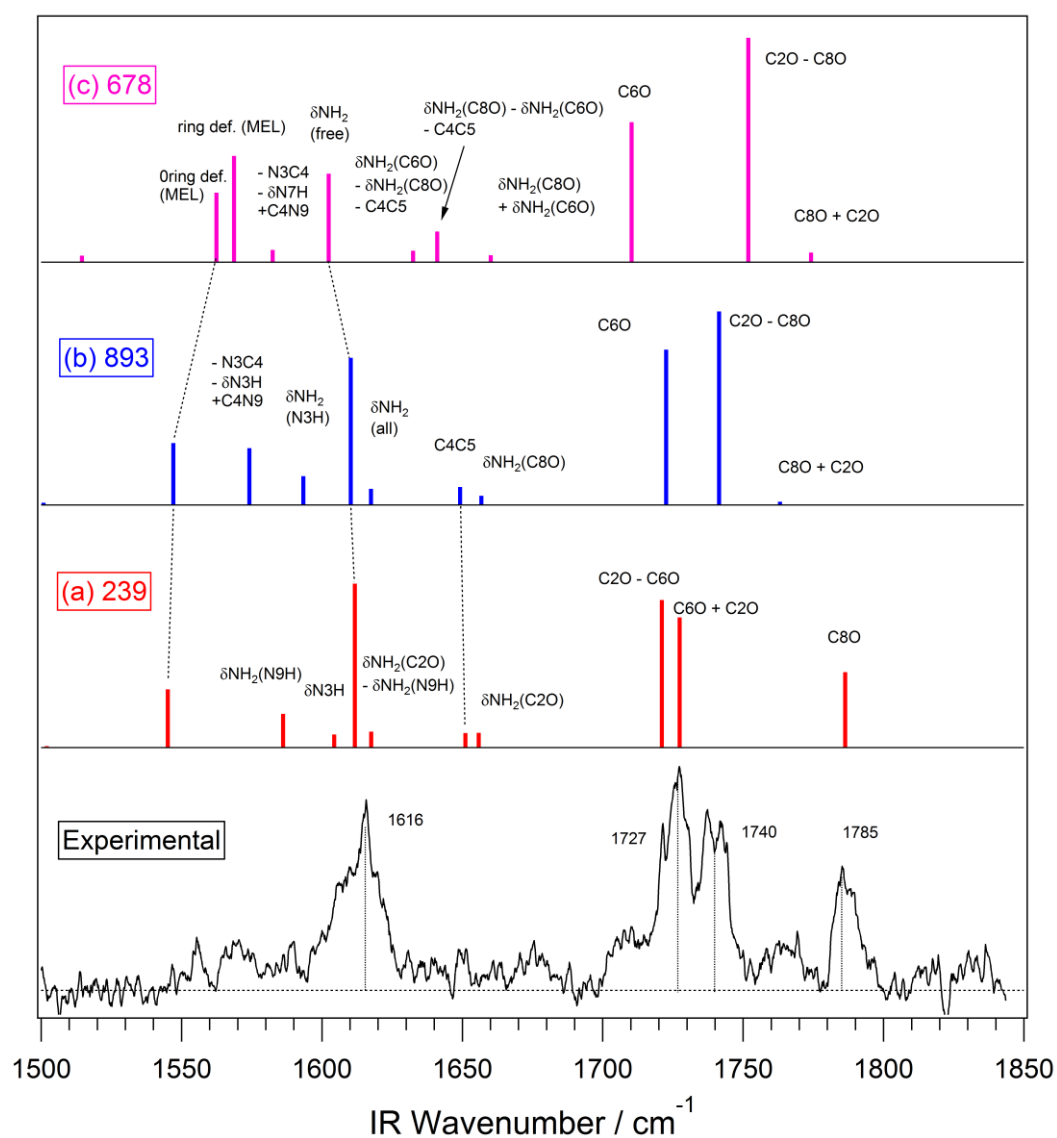

**Fig. S2** Calculated IR spectra (scaled by a factor of 0.982) and vibrational assignments for the three lowest energy isomers (structures 239, 893, and 678 in Fig. 1) of the UA-MEL complex. Experimental IR spectrum reproduced from Fig. 6 is also shown for comparison.
